# Supplementary material
Source: PubMed Central journal article supplement (PMC8129357)
Supplement: ajtr0013-2388-f2.pdf [file ajtr0013-2388-f2.pdf]

## Risk factors for death in patients with sHLH

**Supplementary Table 1.** The Cutoff-value and the difference between two sides of Age, Temperature, WBC, HGB and PLT between survivors and non-survivors

| Parameters              | Cutoff-value | P-value | 95% Confidence Interval |
|-------------------------|--------------|---------|-------------------------|
| Age (years)             | 54.5         | <0.0001 | 12.23-30.900            |
| Temperature (°C)        | 39.15        | 0.0028  | 1.268-2.138             |
| WBC ( $\times 10^9/L$ ) | 2.515        | 0.0002  | 2.293-6.891             |
| HG (g/L)                | 115          | <0.0001 | 97.660-156.500          |
| PLT ( $\times 10^9/L$ ) | 1.505        | <0.0001 | 1.486-3.695             |

Abbreviations: WBC: White blood cell; PLT: Platelet; HGB: Hemoglobin.

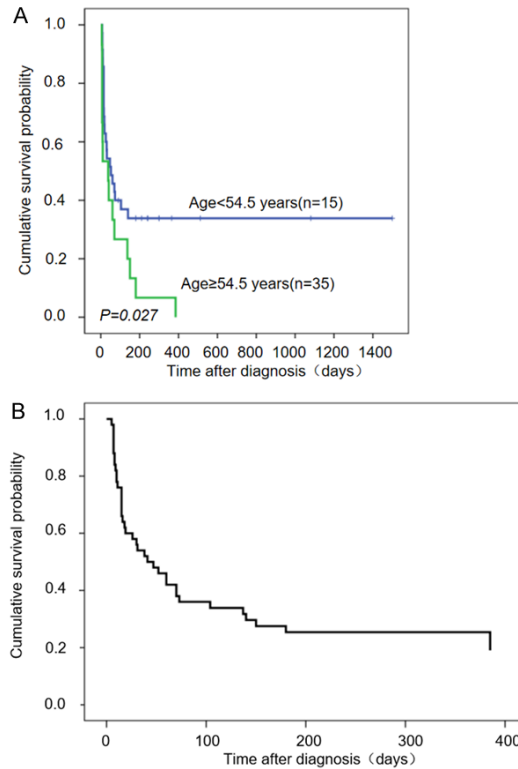

**Supplementary Figure 1.** Overall survival function and age Kaplan-Meier survival curve. Kaplan-Meier curve of patients Overall survival (OS) with (A) Age <54.5 years or ≥54.5 years (n = 15). (B) The cumulative survival probability function of HLH patients.

## Risk factors for death in patients with sHLH

**Supplementary Table 2.** The Cutoff-value and the difference between two sides of cytokines in the survival time of HLH patients between 1-10 days and >10 days

| Parameters (pg/mL) | Cutoff-value | P-value | 95% Confidence Interval |
|--------------------|--------------|---------|-------------------------|
| IL-1 $\beta$       | 2.835        | 0.0592  | -                       |
| IL-2               | 3.35         | 0.0351  | 6.986-181.200           |
| IL-4               | 4.035        | <0.0001 | 2.680-4.767             |
| IL-5               | 2.495        | <0.0001 | 1.266-2.336             |
| IL-6               | 58.39        | 0.0009  | 103.500-366.800         |
| IL-8               | 17.335       | 0.0608  | -                       |
| IL-10              | 944.35       | <0.0001 | 1225.000-1626.000       |
| IL-12P70           | 6.855        | <0.0001 | 5.259-9.709             |
| IL-17A             | 1.93         | 0.0002  | 1.358-3.751             |
| IL-17F             | 2.845        | 0.0009  | 1.744-5.765             |
| IL-22              | 0.87         | 0.2337  | -                       |
| IL- $\gamma$       | 3.895        | 0.1066  | -                       |
| TNF- $\alpha$      | 4.43         | 0.0005  | 10.910-33.150           |
| TNF- $\beta$       | 2.895        | 0.0427  | 0.1186-6.483            |

**Supplementary Table 3.** The Cutoff-value and the difference between two sides of cytokines in the survival time of HLH patients between 1-30 days and >30 days

| Parameters (pg/mL) | Cutoff-value | P-value | 95% Confidence Interval |
|--------------------|--------------|---------|-------------------------|
| IL-1 $\beta$       | 2.05         | 0.2944  | -                       |
| IL-2               | 2.38         | 0.1166  | -                       |
| IL-4               | 3.315        | <0.0001 | 2.665-4.416             |
| IL-5               | 1.245        | 0.0009  | 0.527-1.758             |
| IL-6               | 58.39        | 0.0009  | 103.500-366.800         |
| IL-8               | 18.005       | 0.0608  | -                       |
| IL-10              | 16.73        | 0.0321  | 28.360-595.500          |
| IL-12P70           | 5.685        | <0.0001 | 4.477-8.601             |
| IL-17A             | 1.93         | 0.0002  | 1.358-3.751             |
| IL-17F             | 2.89         | 0.0005  | 1.954-6.032             |
| IL-22              | 1.685        | 0.0106  | 2.090-14.090            |
| IL- $\gamma$       | 1.655        | 0.4672  | -                       |
| IL- $\alpha$       | 1.265        | 0.1796  | -                       |
| TNF- $\beta$       | 4.04         | <0.0001 | 5.613-14.240            |

## Risk factors for death in patients with sHLH

**Supplementary Table 4.** The Cutoff-value and the difference between two sides of cytokines in the survival time of HLH patients between 1-60 days and >60 days

| Parameters (pg/mL) | Cutoff-value | P-value | 95% Confidence Interval |
|--------------------|--------------|---------|-------------------------|
| IL-1 $\beta$       | 2.05         | 0.2944  | -                       |
| IL-2               | 2.375        | 0.1166  | -                       |
| IL-4               | 2.675        | <0.0001 | 2.593-4.342             |
| IL-5               | 1.245        | 0.0009  | 0.5273-1.758            |
| IL-6               | 58.39        | 0.0009  | 103.5-366.800           |
| IL-8               | 58.39        | 0.0008  | 90.090-311.700          |
| IL-10              | 16.725       | 0.0321  | 28.36-595.500           |
| IL-12P70           | 5.685        | <0.0001 | 4.477-8.601             |
| IL-17A             | 1.93         | 0.0002  | 1.358-3.751             |
| IL-17F             | 2.89         | 0.0005  | 1.954-6.032             |
| IL-22              | 1.34         | 0.0889  | -                       |
| IL- $\gamma$       | 2.895        | 0.2017  | -                       |
| TNF- $\alpha$      | 3.08         | 0.0302  | 1.307-23.500            |
| TNF- $\beta$       | 4.04         | 0.0071  | 1.598-9.037             |

**Supplementary Table 5.** The Cutoff-value and the difference between two sides of cytokines in the survival time of HLH patients between 1-90 days and >90 days

| Parameters (pg/mL) | Cutoff-value | P-value | 95% Confidence Interval |
|--------------------|--------------|---------|-------------------------|
| IL-1 $\beta$       | 2.835        | 0.0592  | -                       |
| IL-2               | 3.35         | 0.0351  | 6.986-181.200           |
| IL-4               | 3.315        | <0.0001 | 2.665-4.416             |
| IL-5               | 1.105        | 0.0017  | 0.485-1.812             |
| IL-6               | 38.68        | 0.0024  | 82.410-349.200          |
| IL-8               | 18.005       | 0.0608  | -                       |
| IL-10              | 16.73        | 0.0321  | 28.360-595.500          |
| IL-12P70           | 6.855        | <0.0001 | 5.259-9.709             |
| IL-17A             | 2.45         | <0.0001 | 2.009-4.123             |
| IL-17F             | 2.835        | 0.0009  | 1.744-5.765             |
| IL-22              | 1.685        | 0.0106  | 2.090-14.090            |
| IL- $\gamma$       | 2.895        | 0.2017  | -                       |
| TNF- $\alpha$      | 3.08         | 0.0302  | 1.307-23.500            |
| TNF- $\beta$       | 4.04         | 0.0071  | 1.598-9.037             |

## Risk factors for death in patients with sHLH

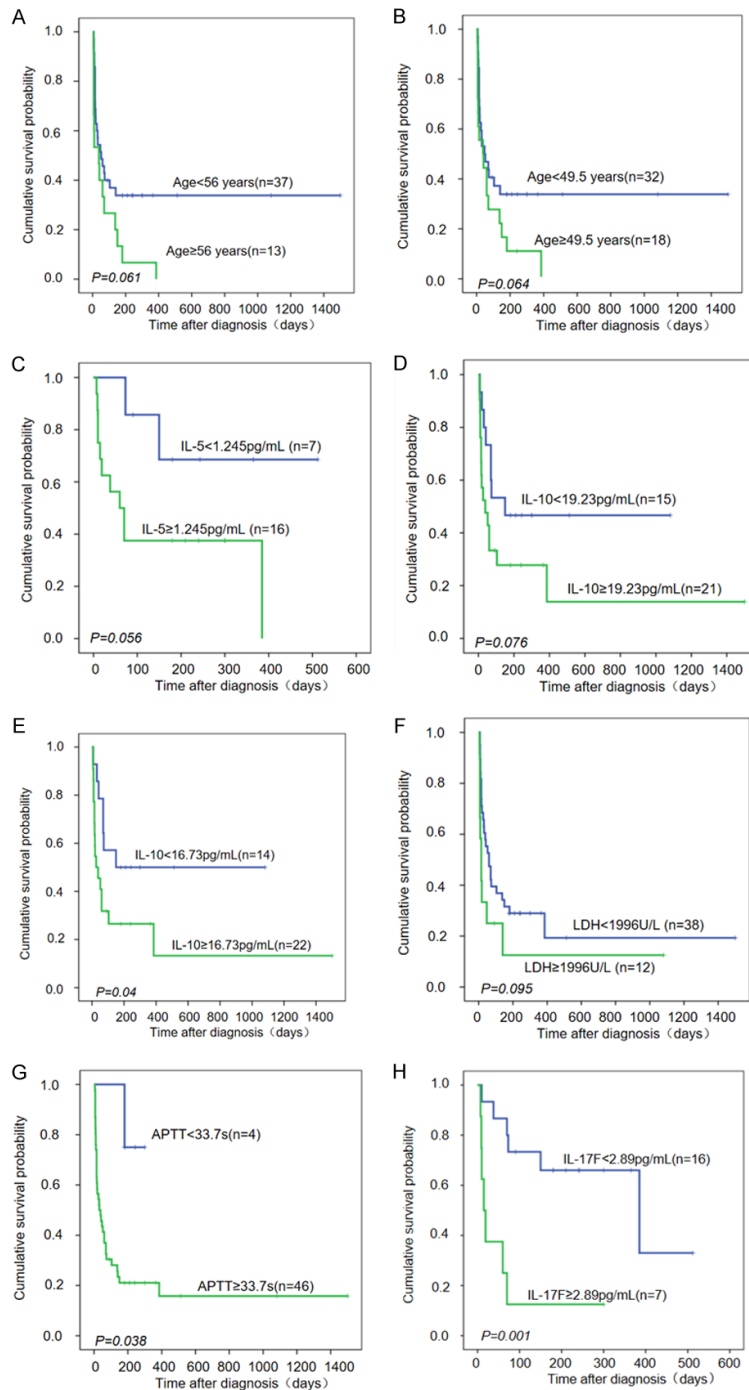

**Supplementary Figure 2.** Age, APTT, LDH, IL-5 and IL-10 Kaplan-Meier survival curve. A. Kaplan-Meier survival curve of patients with Death within 30 days and 60 days of age  $\ge 56$  years-old or age  $< 56$  years-old. B. Kaplan-Meier survival curve of patients with Death within 30 days and 60 days of age  $\ge 49.5$  years-old or age  $< 49.5$  years-old. C. Kaplan-Meier survival curve of patients with Death within 10 days, 30 days, 60 days, 90 days and non-survivors of IL-5  $\ge 1.245$  pg/mL or IL-5  $< 1.245$  pg/mL on both sides. D. Kaplan-Meier survival curve of patients with Death within 10 days of IL-10  $\ge 19.23$  pg/mL or IL-10  $< 19.23$  pg/mL. E. Kaplan-Meier survival curve of patients with Death within 30 days, 60 days and non-survivors of IL-10  $\ge 16.73$  pg/mL or IL-10  $< 16.73$  pg/mL. F. Kaplan-Meier survival curve of patients with Death within 60 days and 90 days of LDH  $\ge 1996$  U/L or LDH  $< 1996$  U/L. G. Kaplan-Meier survival curve of patients with Death within non-survivors of APTT  $\ge 33.7$  s or APTT  $< 33.7$  s. H. Kaplan-Meier survival curve of patients with Death within 10 days, 30 days, 60 days, 90 days non-survivors of IL-17F  $\ge 2.89$  pg/mL or IL-17F  $< 2.89$  pg/mL.

## Risk factors for death in patients with sHLH

**Supplementary Table 6.** Age, PLT, APTT, TRIG, LDH, IL-5, IL-10, IL-17F multi-factor analysis

| Duration of survival        | Parameters              | Adverse factor | P-value | Hazard ratio |
|-----------------------------|-------------------------|----------------|---------|--------------|
| Survivors and non-survivors | Age (years)             | 54.5           | 0.055   | 4.286        |
|                             | IL-10 (pg/mL)           | 16.73          | 0.05    | 4.762        |
|                             | IL-17F (pg/mL)          | 2.89           | 0.025   | 9.044        |
|                             | PLT ( $\times 10^9/L$ ) | 115            | 0.873   | 1.129        |
|                             | LDH (U/L)               | -              | -       | -            |
|                             | IL-5 (pg/mL)            | 1.245          | 0.669   | 0.636        |
|                             | APTT (s)                | 33.7           | 0.983   | >100         |
| 1-10 days and >10 days      | Age (years)             | 56             | 0.016   | 8.452        |
|                             | IL-10 (pg/mL)           | 19.23          | 0.582   | 1.557        |
|                             | IL-17F (pg/mL)          | 2.89           | 0.021   | 8.002        |
|                             | PLT ( $\times 10^9/L$ ) | -              | -       | -            |
|                             | LDH (U/L)               | 1996           | 0.484   | 2.429        |
|                             | IL-5 (pg/mL)            | 1.245          | 0.589   | 1.557        |
|                             | APTT (s)                | 41.75          | 0.315   | 2.117        |
| 1-30 days and >30 days      | Age (years)             | 56             | 0.021   | 8.098        |
|                             | IL-10 (pg/mL)           | 16.73          | 0.640   | 1.458        |
|                             | IL-17F (pg/mL)          | 2.89           | 0.009   | 12.298       |
|                             | PLT ( $\times 10^9/L$ ) | 16             | 1.000   | 1.000        |
|                             | LDH (U/L)               | 360            | 0.750   | 0.604        |
|                             | IL-5 (pg/mL)            | 1.245          | 0.837   | 0.782        |
|                             | APTT (s)                | -              | -       | -            |
| 1-60 days and >60 days      | Age (years)             | 49.5           | 0.248   | 2.817        |
|                             | IL-10 (pg/mL)           | 16.73          | 0.771   | 1.277        |
|                             | IL-17F (pg/mL)          | 2.89           | 0.033   | 5.056        |
|                             | PLT ( $\times 10^9/L$ ) | 115            | 0.766   | 1.255        |
|                             | LDH (U/L)               | 1996           | 0.172   | 4.876        |
|                             | IL-5 (pg/mL)            | 1.245          | 0.561   | 1.968        |
|                             | APTT (s)                | 34.55          | 0.997   | 1.006        |
| 1-90 days and >90 days      | Age (years)             | -              | -       | -            |
|                             | IL-10 (pg/mL)           | 7.27           | 0.102   | 3.108        |
|                             | IL-17F (pg/mL)          | 2.835          | 0.048   | 4.946        |
|                             | PLT ( $\times 10^9/L$ ) | 115            | 0.536   | 1.476        |
|                             | LDH (U/L)               | 1996           | 0.149   | 3.857        |
|                             | IL-5 (pg/mL)            | 1.105          | 0.784   | 1.309        |
|                             | APTT (s)                | 34.55          | 0.855   | 4.946        |

Through the multivariate analysis of risk factors, IL-17F in the Cox proportional hazards model analysis is that each stage of survival is a risk factor for patient death. HR are 9.044 (P = 0.025), 8.002 (P = 0.021), 12.298 (P = 0.009), 5.056 (P = 0.033), 4.946 (P = 0.048). Age  $\geq 56$  years-old are risk factors in survival times of 1-10 days and >10 days, 1-30 days and >30 days (HR = 8.452, P = 0.016; HR = 8.098, P = 0.021). IL-10  $\geq 16.73$  pg/mL was a risk factor for Survivors and non-Survivors group (HR = 4.762, P = 0.05).
